# Supplementary material for: A unique Zn(ii)-based MOF fluorescent probe for the dual detection of nitroaromatics and ketones in water
Source: Royal Society of Chemistry journal article supplement (doi:10.1039/c5ce02000j), 2015-01-01
Supplement: c5ce02000j1.pdf [file c5ce02000j1.pdf]

## Electronic Supplementary Information (ESI)

### **A unique Zn(II)-based MOF fluorescent probe for the dual detection of nitroaromatics and ketones in water**

Yi-Xiang Shi,<sup>a</sup> Fei-Long Hu,<sup>a</sup> Wen-Hua Zhang<sup>\*a</sup> and Jian-Ping Lang<sup>\*a,b</sup>

<sup>a</sup> *College of Chemistry, Chemical Engineering and Materials Science, Soochow University, Suzhou 215123, P. R. China. Fax: 86-512-65880328; E-mail: [jplang@suda.edu.cn](mailto:jplang@suda.edu.cn); [whzhang@suda.edu.cn](mailto:whzhang@suda.edu.cn)*

<sup>b</sup> *State Key Laboratory of Organometallic Chemistry, Shanghai Institute of Organic Chemistry, Chinese Academy of Sciences, Shanghai 200032, P. R. China.*

## Contents

|                 |                                                                                                                                                                                                      |    |
|-----------------|------------------------------------------------------------------------------------------------------------------------------------------------------------------------------------------------------|----|
| <b>Fig. S1</b>  | The $^1\text{H}$ NMR spectrum of the bpvp ligand. ....                                                                                                                                               | S3 |
| <b>Fig. S2</b>  | The TGA curve for <b>1</b> . ....                                                                                                                                                                    | S3 |
| <b>Fig. S3</b>  | The emission spectra of <b>1</b> in $\text{H}_2\text{O}$ with the addition of different concentrations of 4-NA excited at 285 nm. ....                                                               | S4 |
| <b>Fig. S4</b>  | The emission spectra of <b>1</b> in $\text{H}_2\text{O}$ with the addition of different concentrations of 4-NP excited at 285 nm. ....                                                               | S4 |
| <b>Fig. S5</b>  | The Stern-Volmer curve of <b>1</b> in $\text{H}_2\text{O}$ with the addition of different concentrations of 2,4-DNP. ....                                                                            | S4 |
| <b>Fig. S6</b>  | The Stern-Volmer curve of <b>1</b> in $\text{H}_2\text{O}$ with the addition of different concentrations of 4-NA. ....                                                                               | S5 |
| <b>Fig. S7</b>  | The Stern-Volmer curve of <b>1</b> in $\text{H}_2\text{O}$ with the addition of different concentrations of 4-NP. ....                                                                               | S5 |
| <b>Fig. S8</b>  | The emission spectra of <b>1</b> in $\text{H}_2\text{O}$ with the addition of different concentrations of acetone excited at 285 nm. ....                                                            | S5 |
| <b>Fig. S9</b>  | The PXRD patterns of <b>1</b> after six cycles experiment for the detection of 2,4-DNP. ....                                                                                                         | S6 |
| <b>Fig. S10</b> | The PXRD patterns of <b>1</b> after six cycles experiment for the detection of <i>p</i> -BQ. ....                                                                                                    | S6 |
| <b>Fig. S11</b> | Spectral overlap between the absorption spectrum of nitroaromatics or ketones ( $2 \times 10^{-5} \text{ mol L}^{-1}$ ) in water and the emission spectrum of <b>1</b> (2 mg) in 2 mL of water. .... | S6 |
| <b>Table S1</b> | Selected bond lengths ( $\text{\AA}$ ) and angles ( $^\circ$ ) for <b>1</b> . ....                                                                                                                   | S7 |
| <b>Table S2</b> | The hydrogen bonding with the protonated pyridyl end in the $\text{Hbpvp}^+$ ligand [ $\text{\AA}$ and $^\circ$ ]. ....                                                                              | S7 |

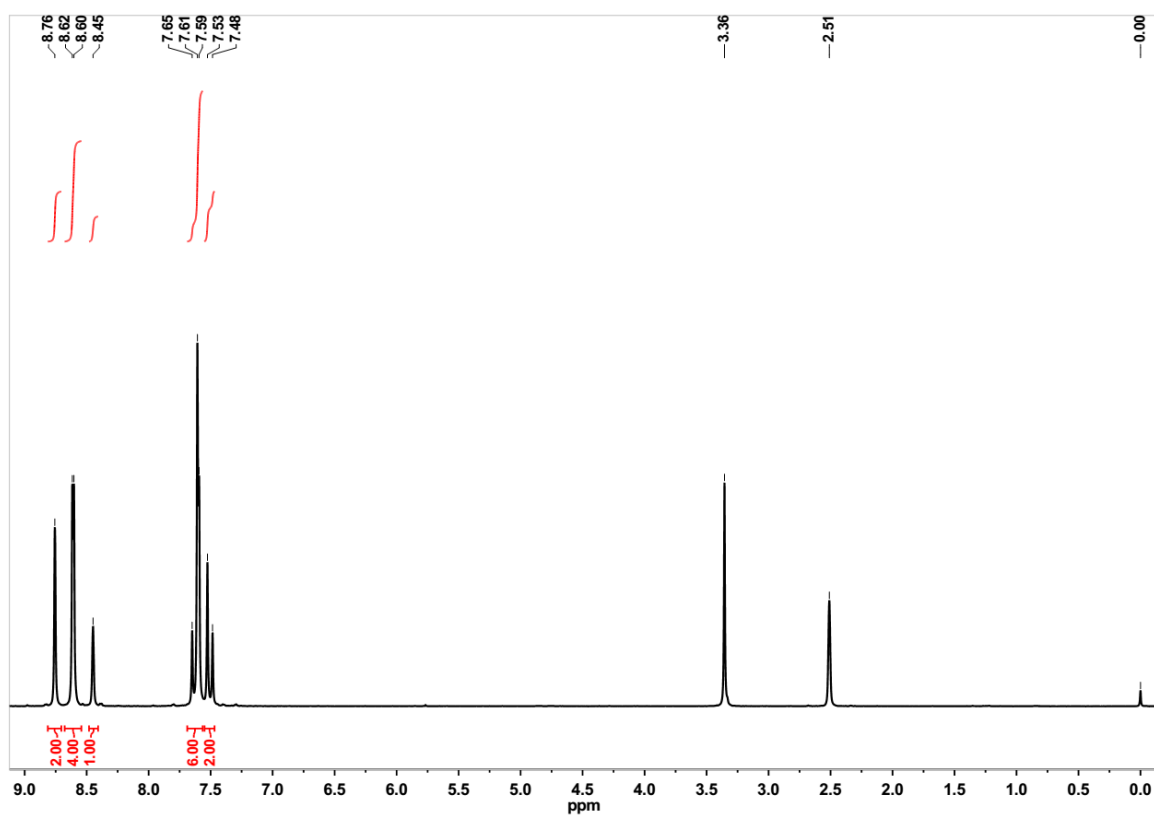

**Fig. S1** The  $^1\text{H}$  NMR spectrum of the bvpv ligand.

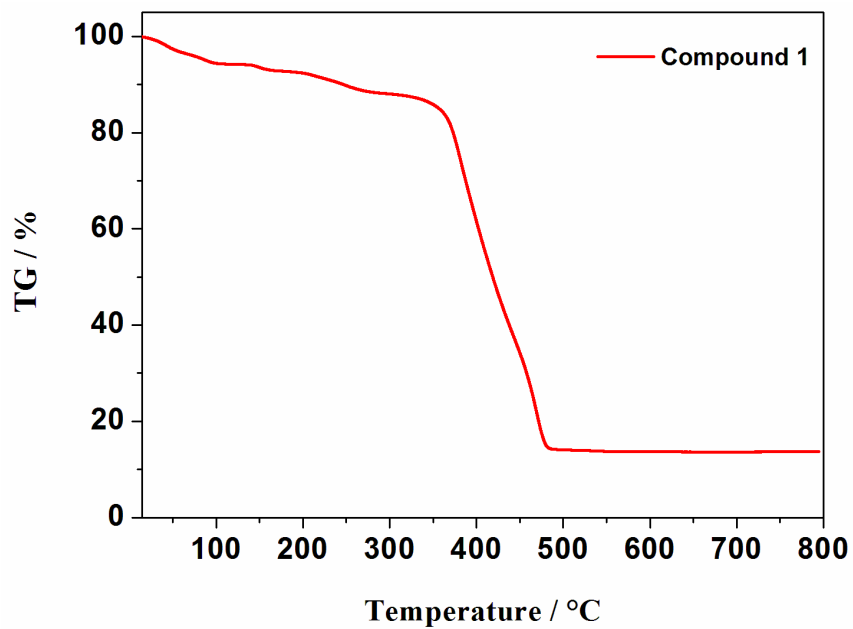

**Fig. S2** The TGA curve of 1.

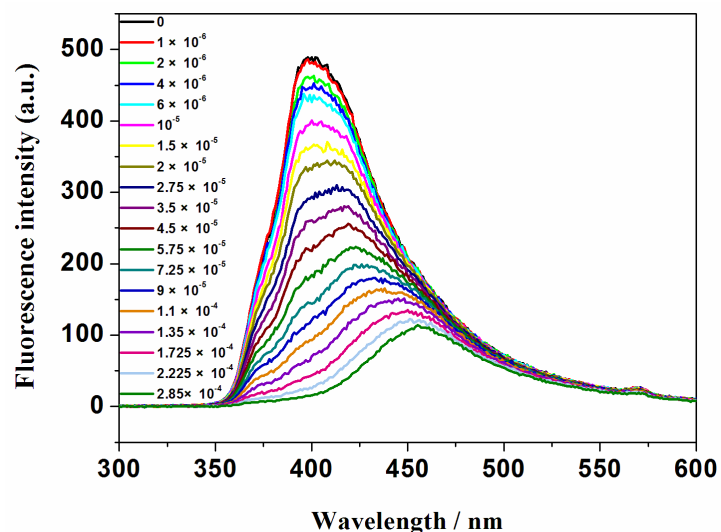

**Fig. S3** The emission spectra of **1** in H<sub>2</sub>O with the addition of different concentrations of 4-NA excited at 285 nm.

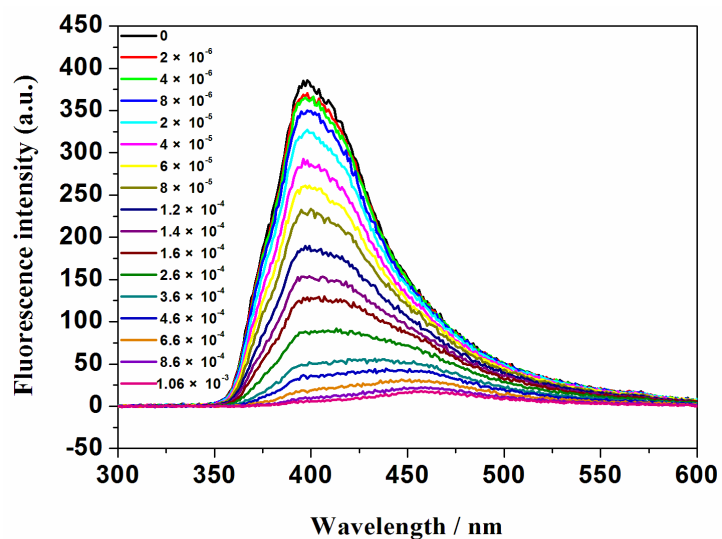

**Fig. S4** The emission spectra of **1** in H<sub>2</sub>O with the addition of different concentrations of 4-NP excited at 285 nm.

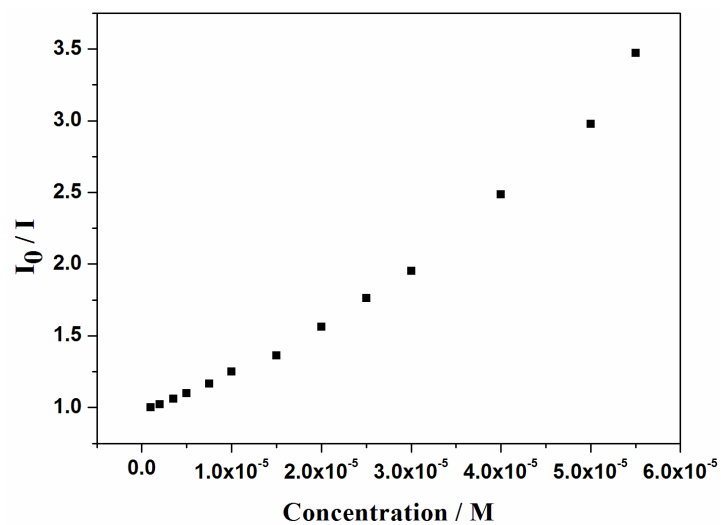

**Fig. S5** The Stern-Volmer curve of **1** in H<sub>2</sub>O with the addition of different concentrations of 2,4-DNP.

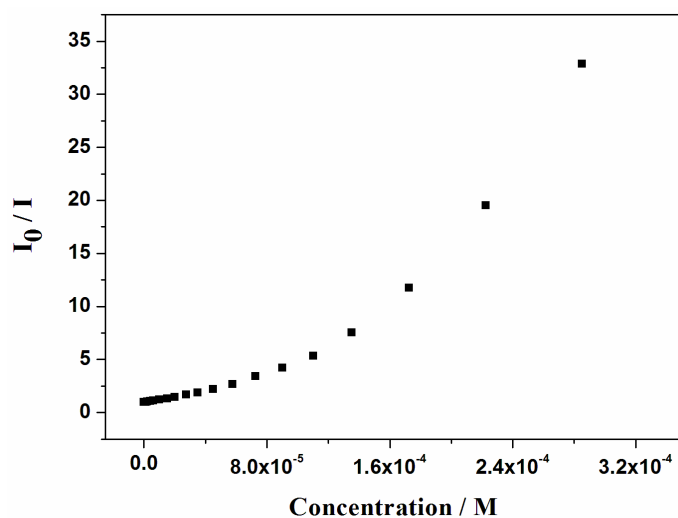

**Fig. S6** The Stern-Volmer curve of **1** in H<sub>2</sub>O with the addition of different concentrations of 4-NA.

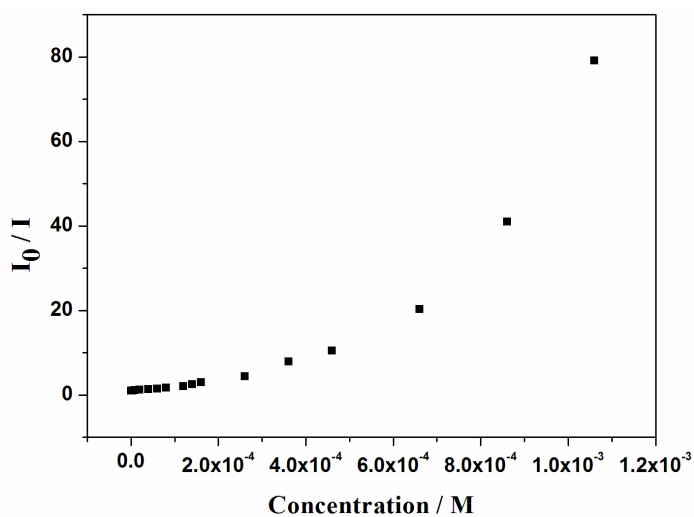

**Fig. S7** The Stern-Volmer curve of **1** in H<sub>2</sub>O with the addition of different concentrations of 4-NP.

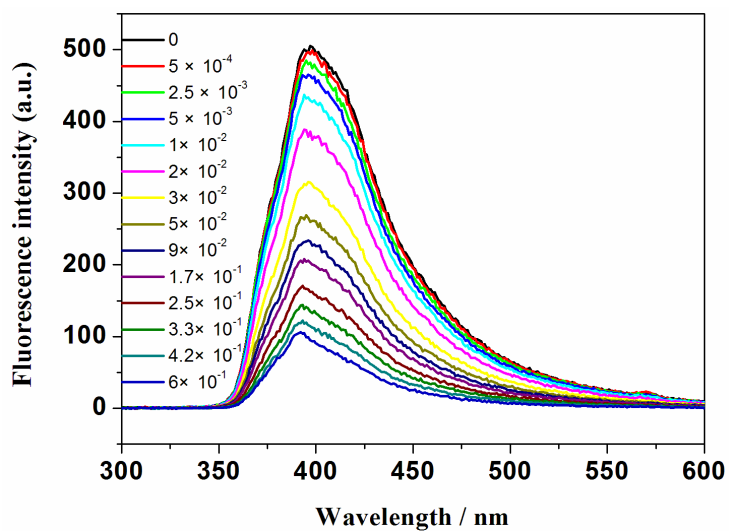

**Fig. S8** The emission spectra of **1** in H<sub>2</sub>O with the addition of different concentrations of acetone excited at 285 nm.

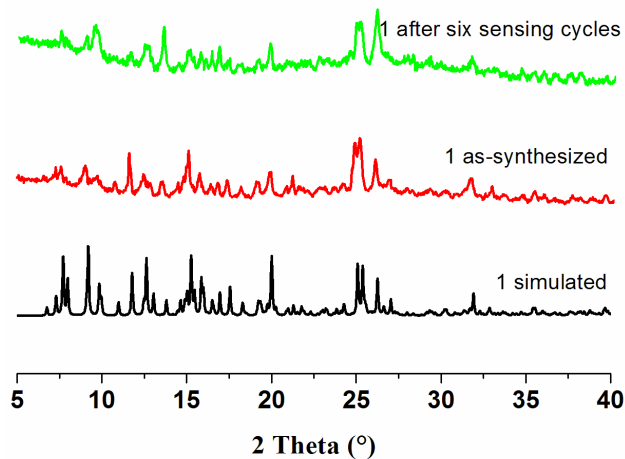

**Fig. S9** The PXRD patterns of **1** after six cycles experiment for the detection of 2,4-DNP.

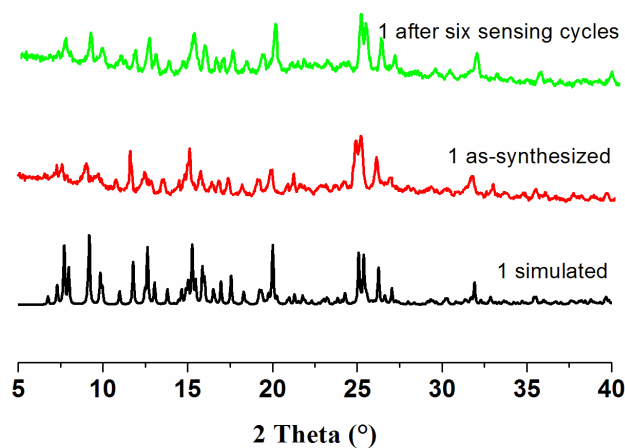

**Fig. S10** The PXRD patterns of **1** after six cycles experiment for the detection of *p*-BQ.

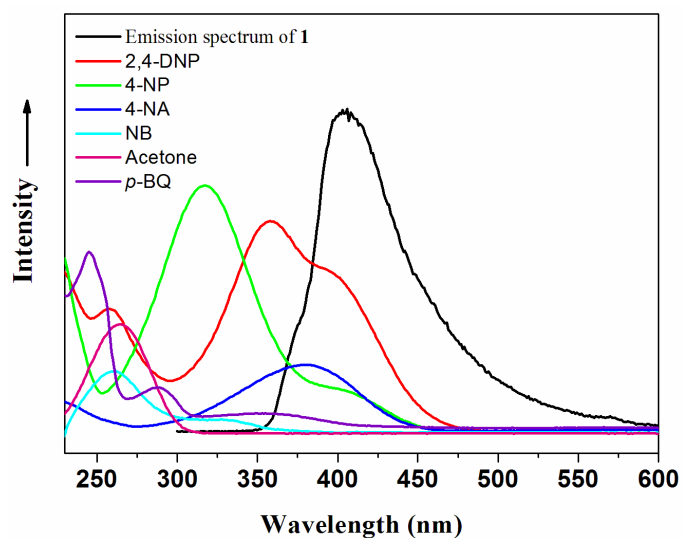

**Fig. S11** Spectral overlap between the absorption spectrum of nitroaromatics or ketones ( $2 \times 10^{-5} \text{ mol L}^{-1}$ ) in water and the emission spectrum of **1** (2 mg) in 2 mL of water.

**Table S1.** Selected bond lengths (Å) and angles (°) for **1**

|                     |            |
|---------------------|------------|
| Zn(1)-O(7)          | 2.005(3)   |
| Zn(1)-O(13)         | 2.021(3)   |
| Zn(1)-N(1)          | 2.031(3)   |
| Zn(1)-O(1)          | 2.055(3)   |
| Zn(1)-Zn(2)         | 3.0093(7)  |
| Zn(2)-O(8)          | 2.025(3)   |
| Zn(2)-N(4)#1        | 2.033(3)   |
| Zn(2)-O(2)          | 2.034(3)   |
| Zn(2)-O(14)         | 2.045(3)   |
| Zn(3)-O(1W)         | 2.047(3)   |
| Zn(3)-N(5)          | 2.092(4)   |
| Zn(3)-O(4)          | 2.259(3)   |
| Zn(3)-O(17)#2       | 2.276(3)   |
| Zn(4)-O(5)#1        | 1.986(3)   |
| Zn(4)-O(9)          | 2.023(3)   |
| Zn(4)-O(2W)         | 2.027(3)   |
| Zn(4)-N(2)#3        | 2.077(3)   |
| Zn(4)-O(10)         | 2.387(3)   |
| O(7)-Zn(1)-O(13)    | 158.65(12) |
| O(7)-Zn(1)-N(1)     | 100.08(13) |
| O(13)-Zn(1)-O(1)    | 87.53(14)  |
| N(1)-Zn(1)-O(1)     | 99.60(14)  |
| O(7)-Zn(1)-Zn(2)    | 82.65(8)   |
| O(8)-Zn(2)-N(4)#1   | 101.75(13) |
| O(8)-Zn(2)-O(2)     | 88.58(15)  |
| O(2)-Zn(2)-O(14)    | 84.67(15)  |
| N(4)#1-Zn(2)-O(20)  | 105.72(13) |
| O(2)-Zn(2)-O(20)    | 156.76(12) |
| O(1W)-Zn(3)-O(18)#2 | 95.12(13)  |
| O(1W)-Zn(3)-N(5)    | 101.70(13) |
| O(1W)-Zn(3)-O(4)    | 156.79(11) |
| N(5)-Zn(3)-O(4)     | 87.09(13)  |
| N(5)-Zn(3)-O(17)#2  | 96.23(12)  |
| O(5)#1-Zn(4)-O(2W)  | 100.40(12) |
| O(2W)-Zn(4)-N(2)#3  | 98.58(13)  |
| O(9)-Zn(4)-O(10)    | 58.80(11)  |
| O(2W)-Zn(4)-O(10)   | 90.55(11)  |
| N(2)#3-Zn(4)-O(10)  | 95.95(11)  |

Symmetry transformations used to generate equivalent atoms for **1**: #1:  $-x + 7/2, y + 1/2, -z + 1/2$ ; #2:  $-x + 5/2, y - 1/2, -z + 1/2$ ; #3:  $x + 1, y, z$ ; #4:  $-x + 7/2, y - 1/2, -z + 1/2$ ; #5:  $-x + 5/2, y + 1/2, -z + 1/2$ ; #6:  $x - 1, y, z$ .

**Table S2.** The hydrogen bonding with the protonated pyridyl end in the Hbpvp ligand [Å and °].

| D-H...A                         | d(D-H)  | d(D...A) | <(DHA) |
|---------------------------------|---------|----------|--------|
| N(3)-H(3N)...O(16) <sup>a</sup> | 0.92(2) | 2.578(5) | 163(6) |
| N(6)-H(6N)...O(12) <sup>b</sup> | 0.91(2) | 2.651(5) | 151(5) |

Symmetry transformations used to generate equivalent atoms: a:  $x - 1, y, z - 1$ ; b:  $-x + 5/2, y - 1/2, -z - 1/2$ .
